# Supplementary material
Source: Frontiers journal article supplement (https://www.frontiersin.org/articles/529947)
Supplement: Data_Sheet_1.PDF [file Data_Sheet_1.PDF]

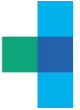

**Department of Pediatric Surgery**  
**Non-invasive sacral nerve stimulation**  
**Evaluation form**

**Current symptoms**

|                      |                                  |                                      |                                 |
|----------------------|----------------------------------|--------------------------------------|---------------------------------|
| Defecation frequency | <input type="radio"/> > 1-1x/day | <input type="radio"/> every 2-3. day | <input type="radio"/> < 2x/week |
| Stool consistency    | <input type="radio"/> hard       | <input type="radio"/> soft           | <input type="radio"/> fluid     |
| Abdominal pain       | <input type="radio"/> yes        | <input type="radio"/> no             |                                 |
| Defecation pain      | <input type="radio"/> yes        | <input type="radio"/> no             |                                 |
| Flatulence           | <input type="radio"/> yes        | <input type="radio"/> no             |                                 |
| Fecal incontinence   | <input type="radio"/> yes        | <input type="radio"/> no             |                                 |
| Soiling              | <input type="radio"/> yes        | <input type="radio"/> no             |                                 |
| Enuresis             | <input type="radio"/> yes        | <input type="radio"/> no             |                                 |

Please specify symptom characteristics: frequency? dependence? further symptoms?

---

---

---

---

**Current therapy**

**Drugs**

- ☐ None
- ☐ Polyethylenglycol single medication (Movicol junior®, Macrogol®, Dulcolax®)
- ☐ Klysmata single medication (Microlax®, Microlist®)
- ☐ Prokinetics
- ☐ Others

Please specify dose and compliance

---

---

**Other therapies**

- ☐ Rectal manipulations
- ☐ Rectal enema (sodium chloride)
- ☐ Biofeedback
- ☐ Lifestyle changes
- ☐ Other, please specify

---

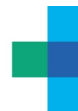

## Non-invasive sacral nerve stimulation

Date of beginning \_\_\_\_\_

|                                                                                                           |                                     |                                     |                                     |                                      |
|-----------------------------------------------------------------------------------------------------------|-------------------------------------|-------------------------------------|-------------------------------------|--------------------------------------|
| Position of electrodes                                                                                    | <input type="radio"/><br>Back left  | <input type="radio"/><br>Back right | Change of position? _____           | Date _____                           |
| Intensity of stimulation (0-10V)?                                                                         |                                     |                                     |                                     |                                      |
| Stimulation time per day?                                                                                 | <input type="radio"/><br>1- 3 hours | <input type="radio"/><br>3-8 hours  | <input type="radio"/><br>8-12 hours | <input type="radio"/><br>12-24 hours |
| Time of stimulation?                                                                                      | <input type="radio"/><br>daytime    | <input type="radio"/><br>nighttime  | <input type="radio"/><br>whole day  | <input type="radio"/><br>variable    |
| Complications due to stimulation?                                                                         | <input type="radio"/><br>no         | <input type="radio"/><br>yes        |                                     |                                      |
| Notes: interruption of therapy? problems? changes in effects? effects on further symptoms? complications? | _____<br>_____<br>_____<br>_____    |                                     |                                     |                                      |

## Quality of life under therapy

|                                                  |                                    |                              |                                  |                            |                            |                            |                                         |
|--------------------------------------------------|------------------------------------|------------------------------|----------------------------------|----------------------------|----------------------------|----------------------------|-----------------------------------------|
| Is the therapy considered to be successful?      | <input type="radio"/><br>no        | <input type="radio"/><br>yes | <input type="radio"/><br>unclear |                            |                            |                            |                                         |
| Is there an improvement of attitude?             | <input type="radio"/><br>no        | <input type="radio"/><br>yes | <input type="radio"/><br>unclear |                            |                            |                            |                                         |
| Is there an improvement of activity/liveliness?  | <input type="radio"/><br>no        | <input type="radio"/><br>yes | <input type="radio"/><br>unclear |                            |                            |                            |                                         |
| Quality of life of the patient?                  | <input type="radio"/><br>1<br>poor | <input type="radio"/><br>2   | <input type="radio"/><br>3       | <input type="radio"/><br>4 | <input type="radio"/><br>5 | <input type="radio"/><br>6 | <input type="radio"/><br>7<br>excellent |
| Further notes on quality of life of the patient? | _____<br>_____<br>_____            |                              |                                  |                            |                            |                            |                                         |
